# Supplementary material for: Insulin Past, Present, and Future: 100 Years from Leonard Thompson
Source: MDPI journal article supplement (doi:10.3390/diabetology3010010), 2022-02-09
Supplement: s1 [file s1]

Archive with 1 entries (1 files):
- diabetology-1497506-supplementary.pdf
