# Supplementary material for: Insulin Past, Present, and Future: 100 Years from Leonard Thompson
Source: MDPI journal article supplement (doi:10.3390/diabetology3010010), 2022-02-09
Supplement: s1 [file s1 › diabetology-1497506-supplementary.pdf]

# Overnight Glucose Blood Glucose Levels (mmol/L)

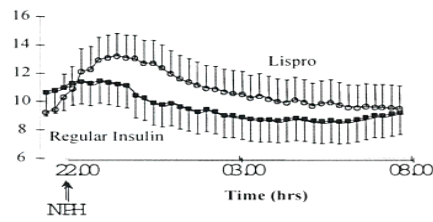

**Figure S1.** Lispro research studies documenting overnight glycemia.

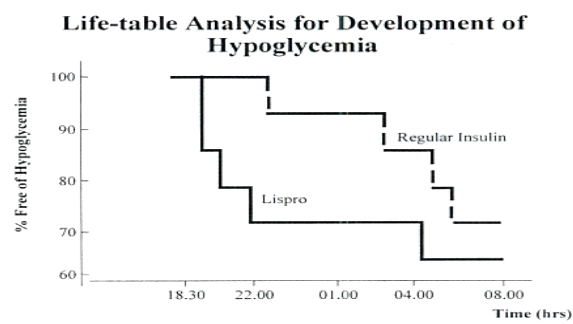

**Figure S2.** Lispro life-table analysis showing hypoglycemia comparison between regular insulin and lispro insulin.

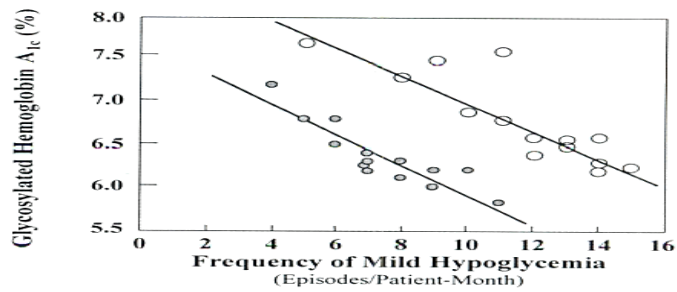

**Figure S3.** Episodes of mild hypoglycemia vs. A<sub>1c</sub> reduced on lispro vs. regular insulin.
